# Supplementary material
Source: Springer Nature journal article supplement (https://www.springermedizin.de/resource/supplementary/13024_2011_237_MOESM14_ESM.pdf/9643734)

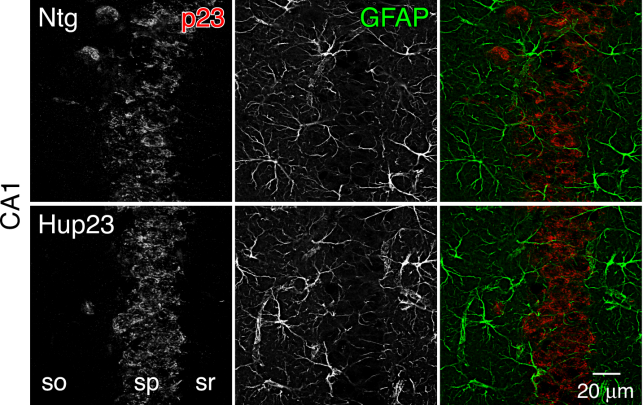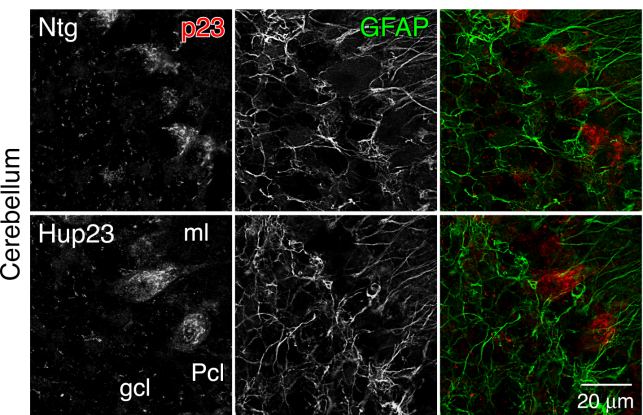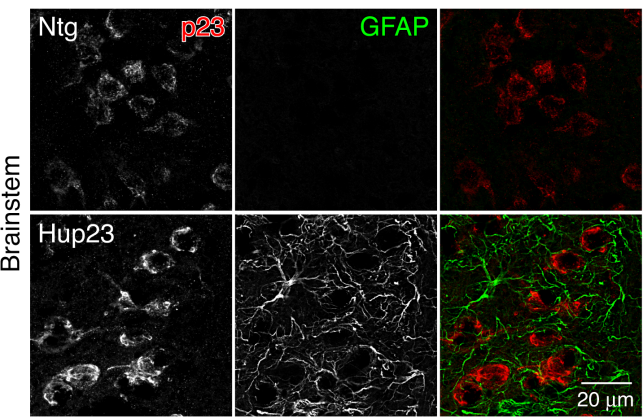

Supplement: MOESM14 [file 9643734]
